# Supplementary material
Source: ML conference proceedings conference paper supplement (https://openreview.net/forum?id=3ijmMNaSJk)

clip\_distilled\_nt

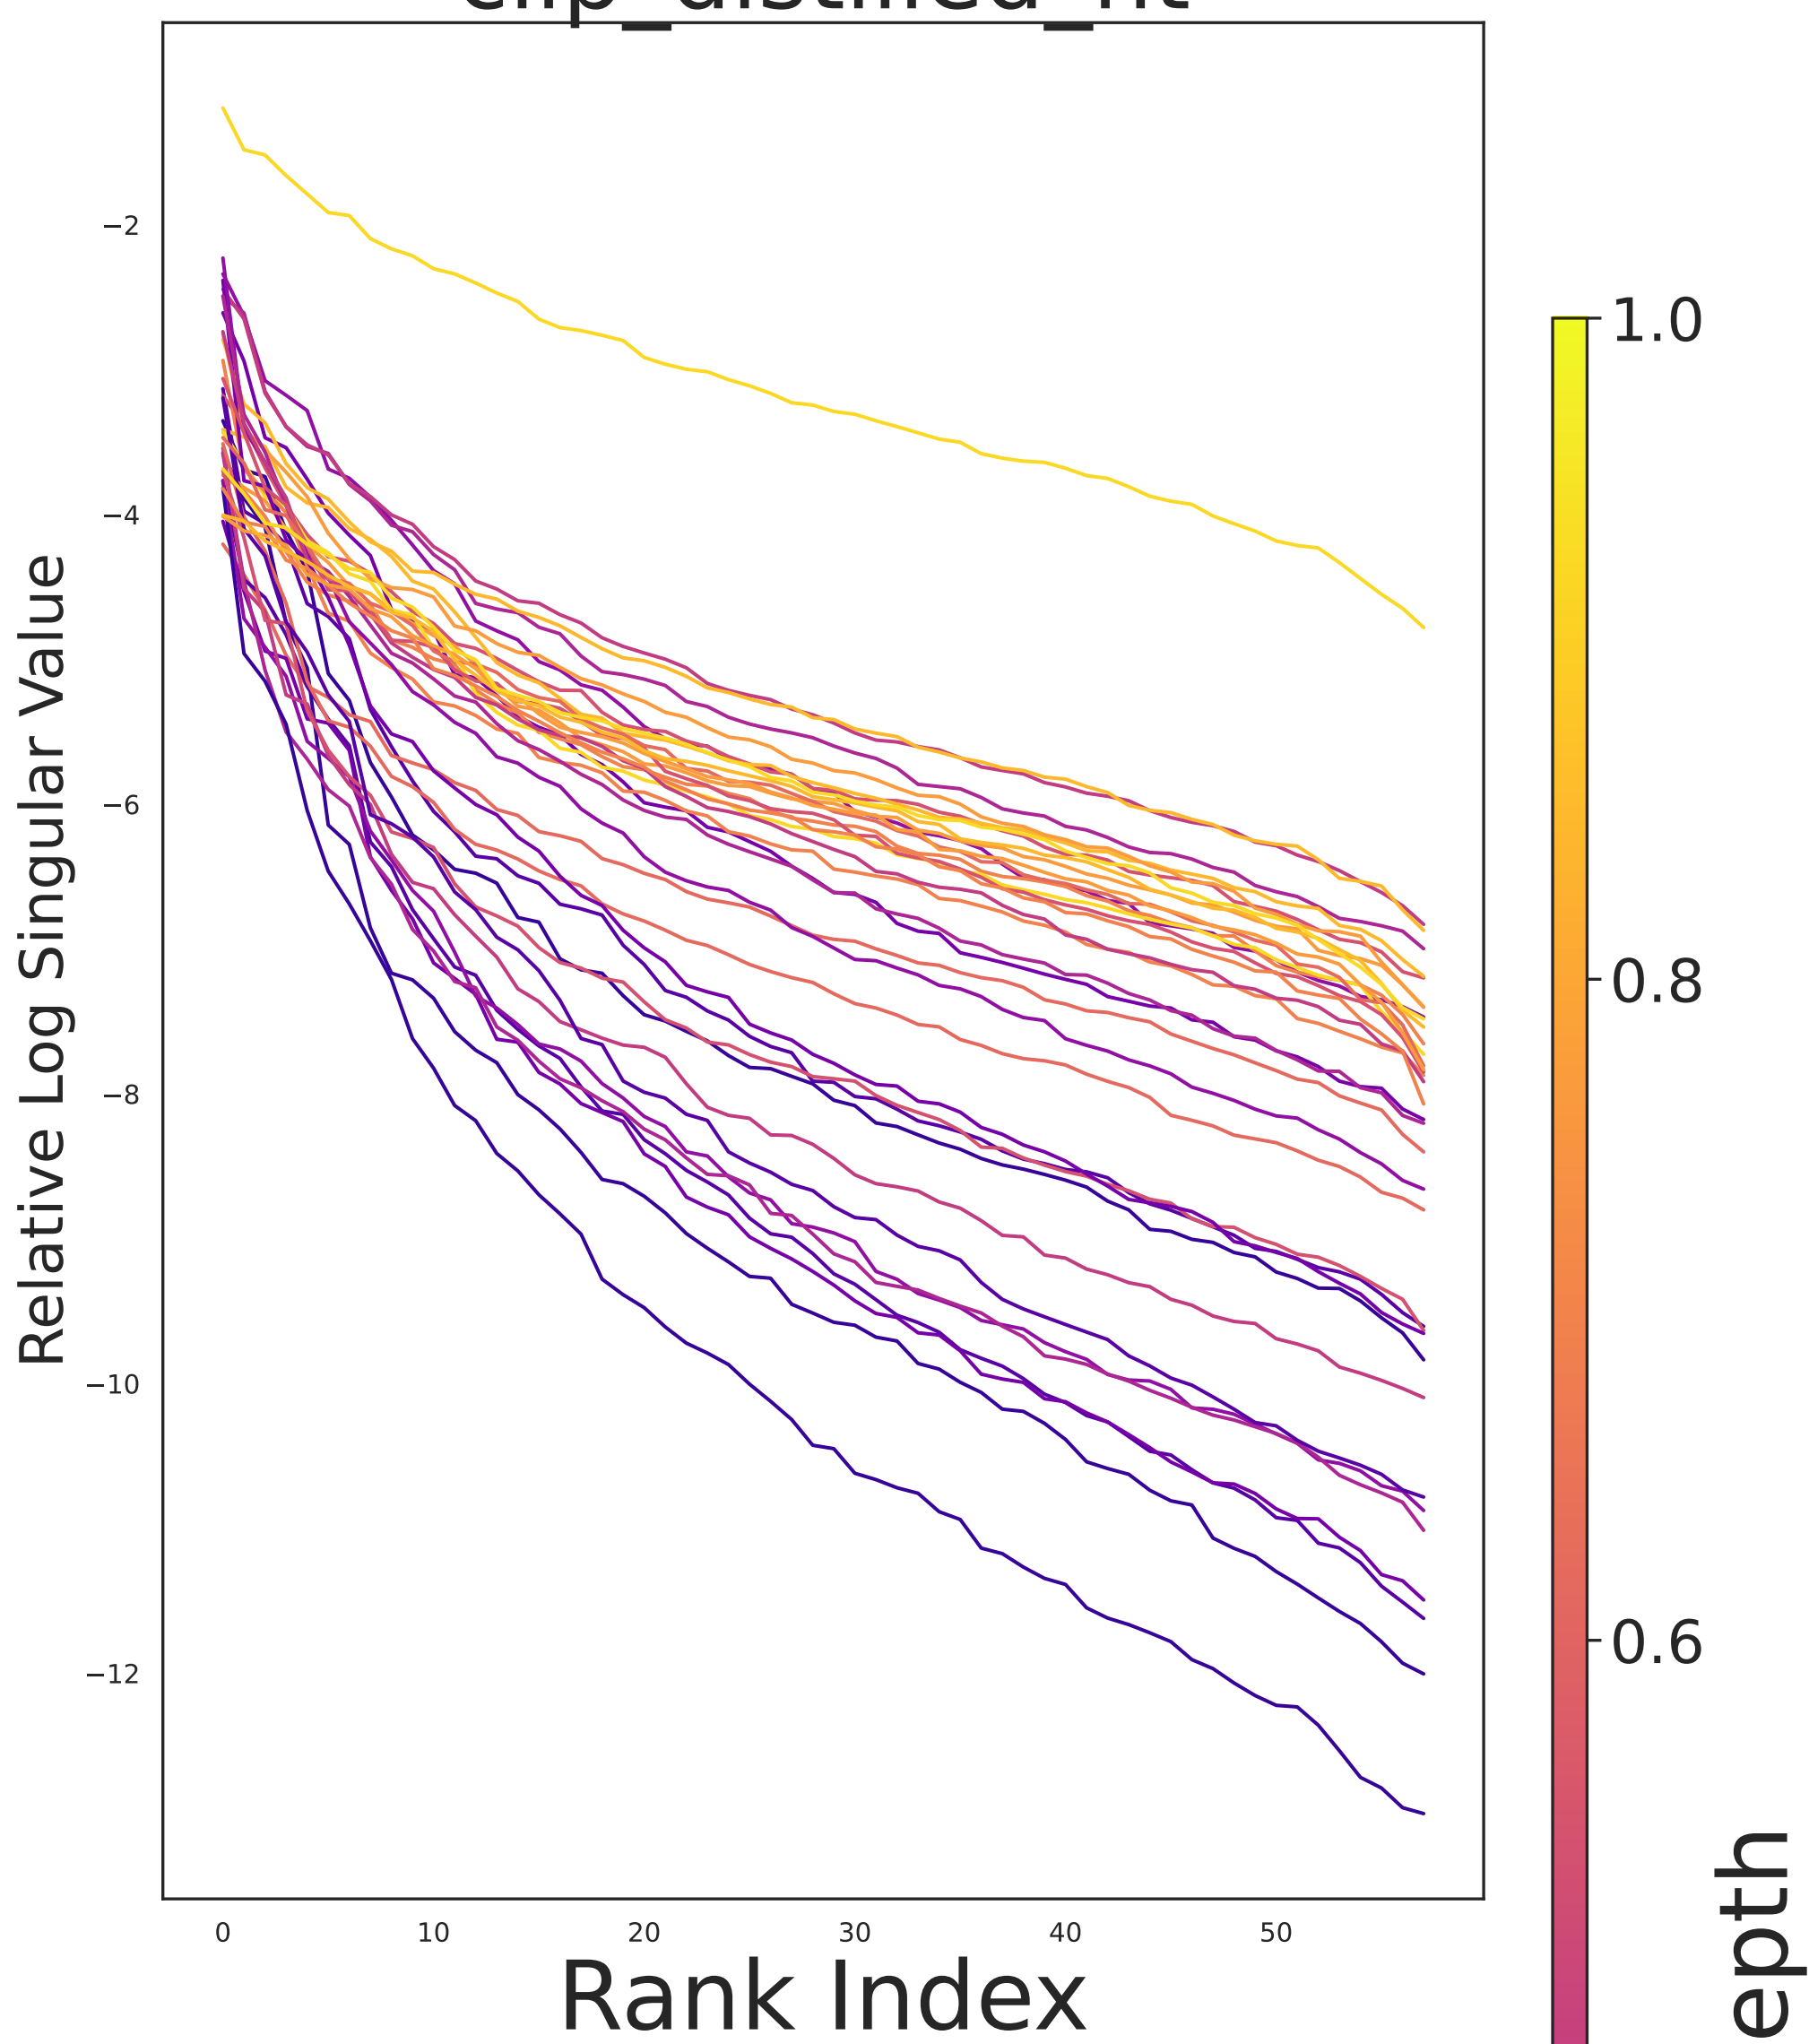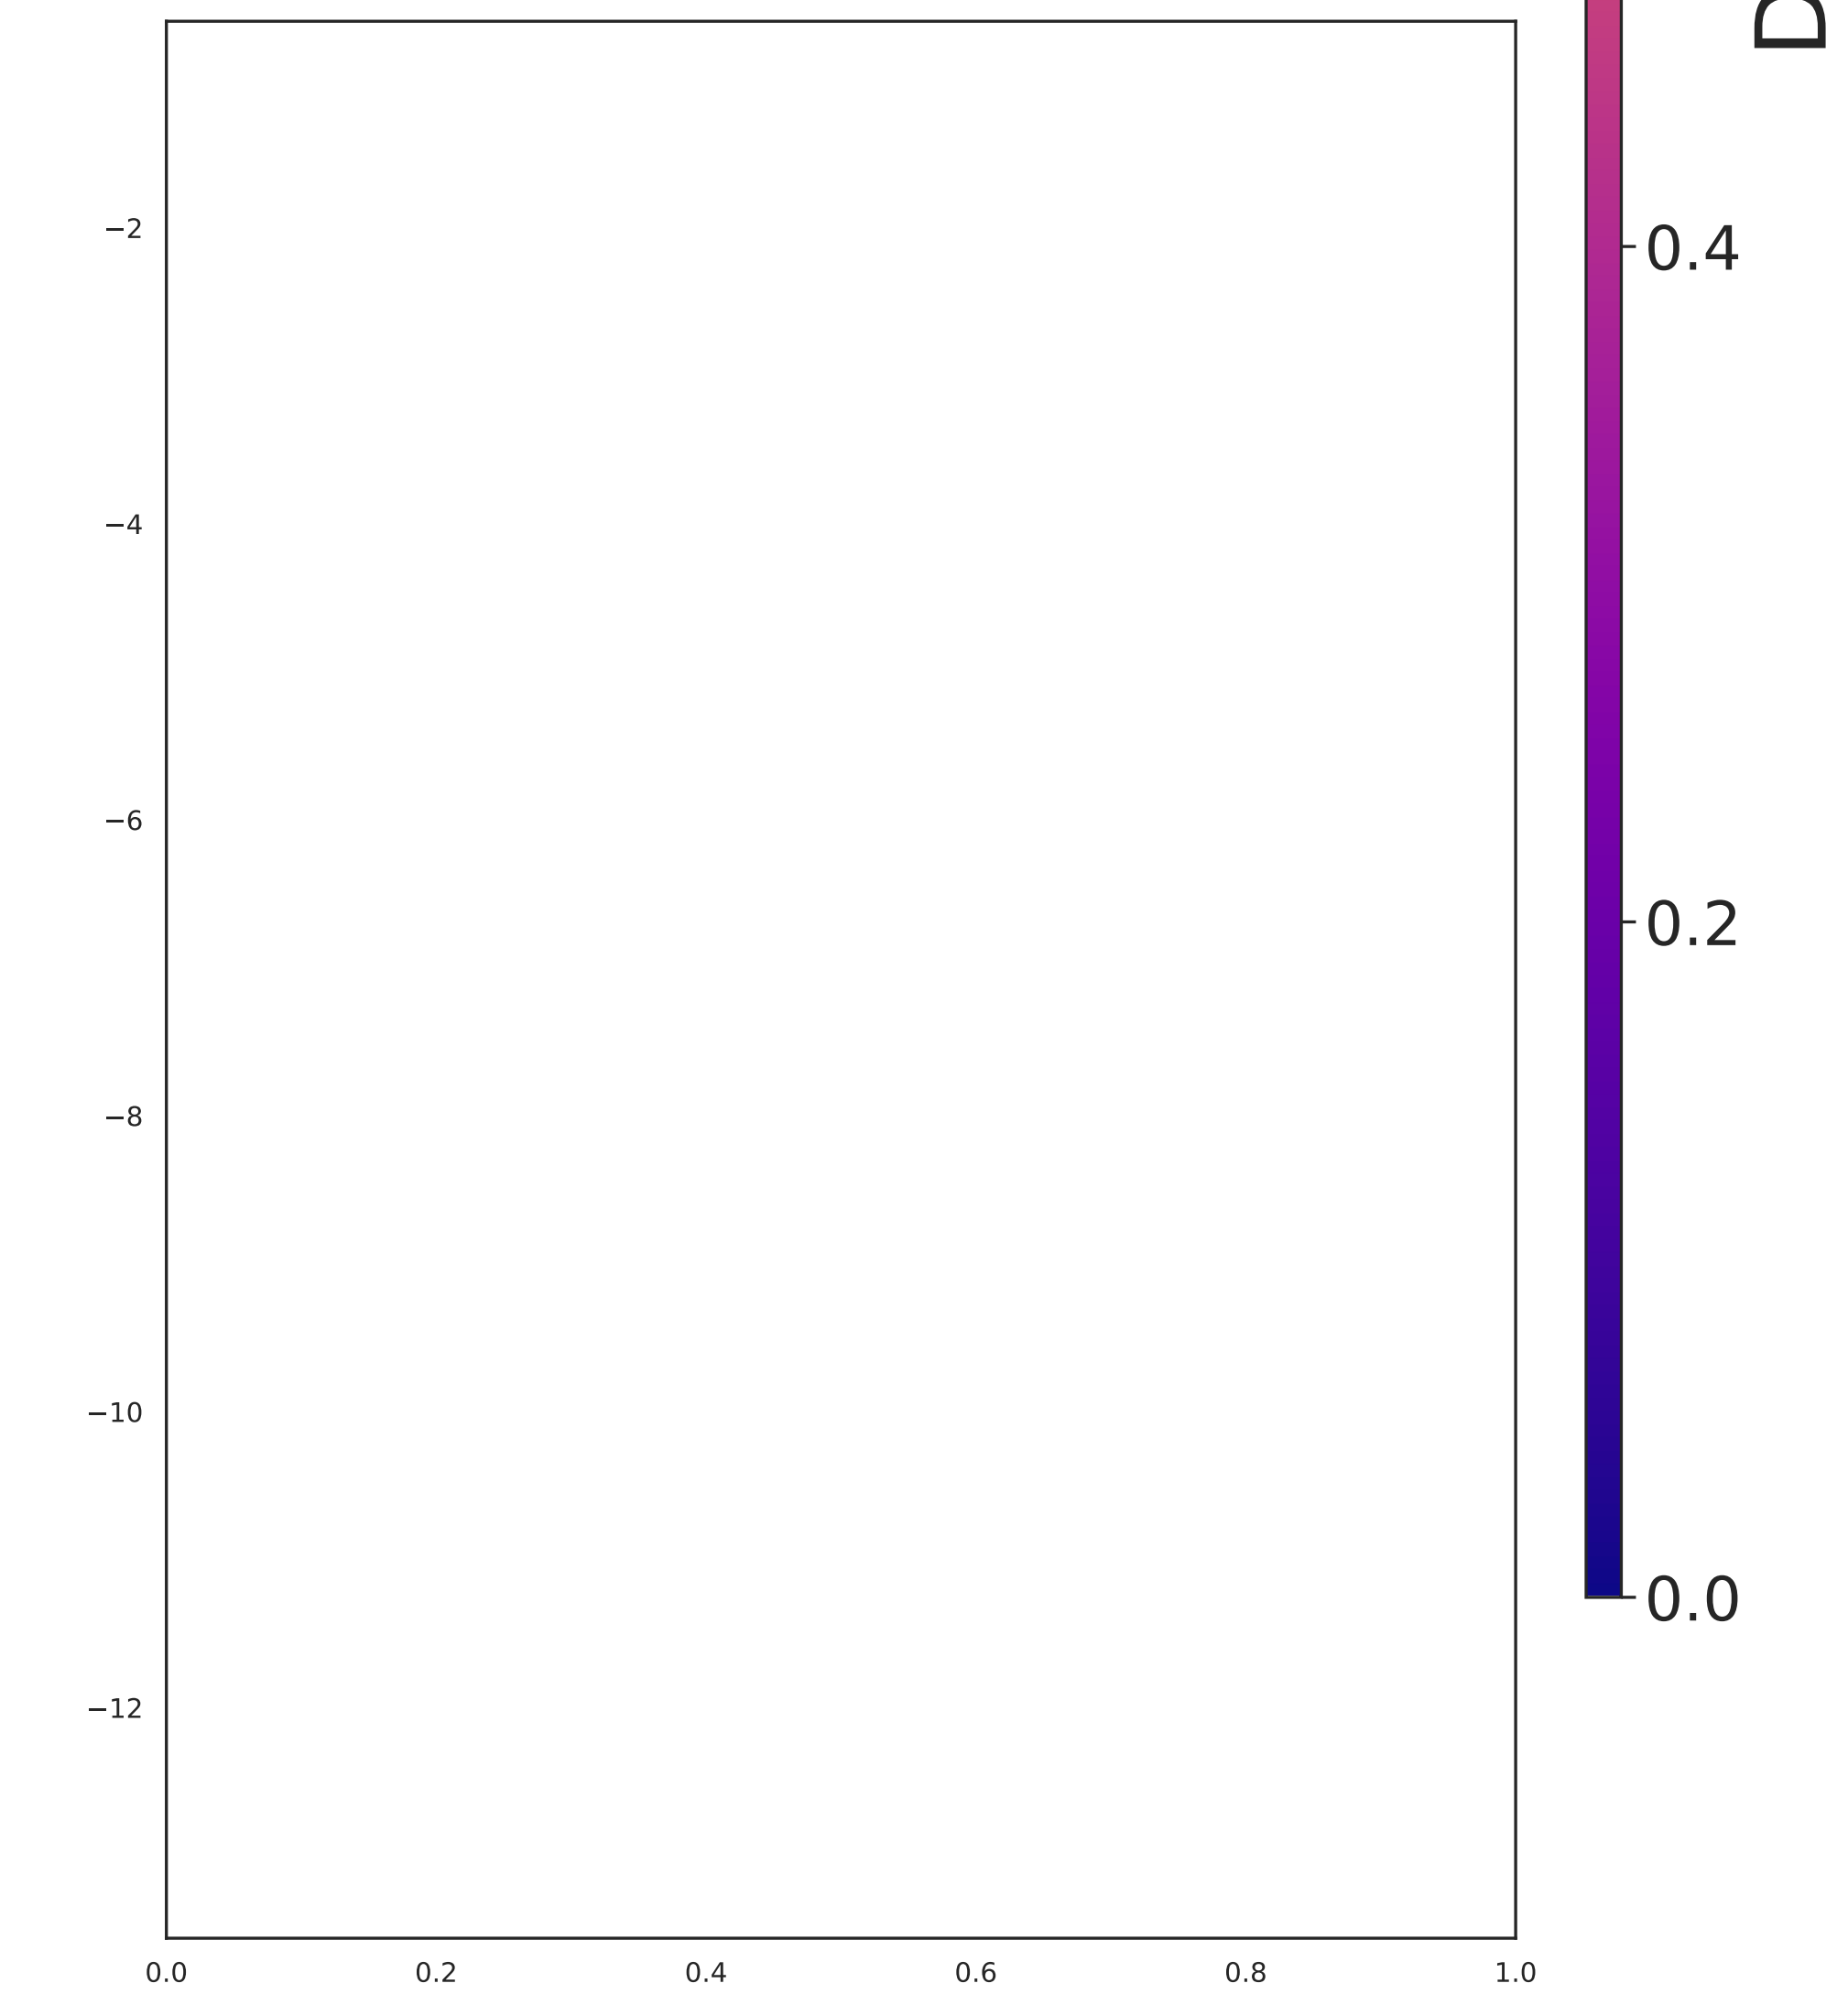

Supplement: supplementary_material [file attachment]

clip

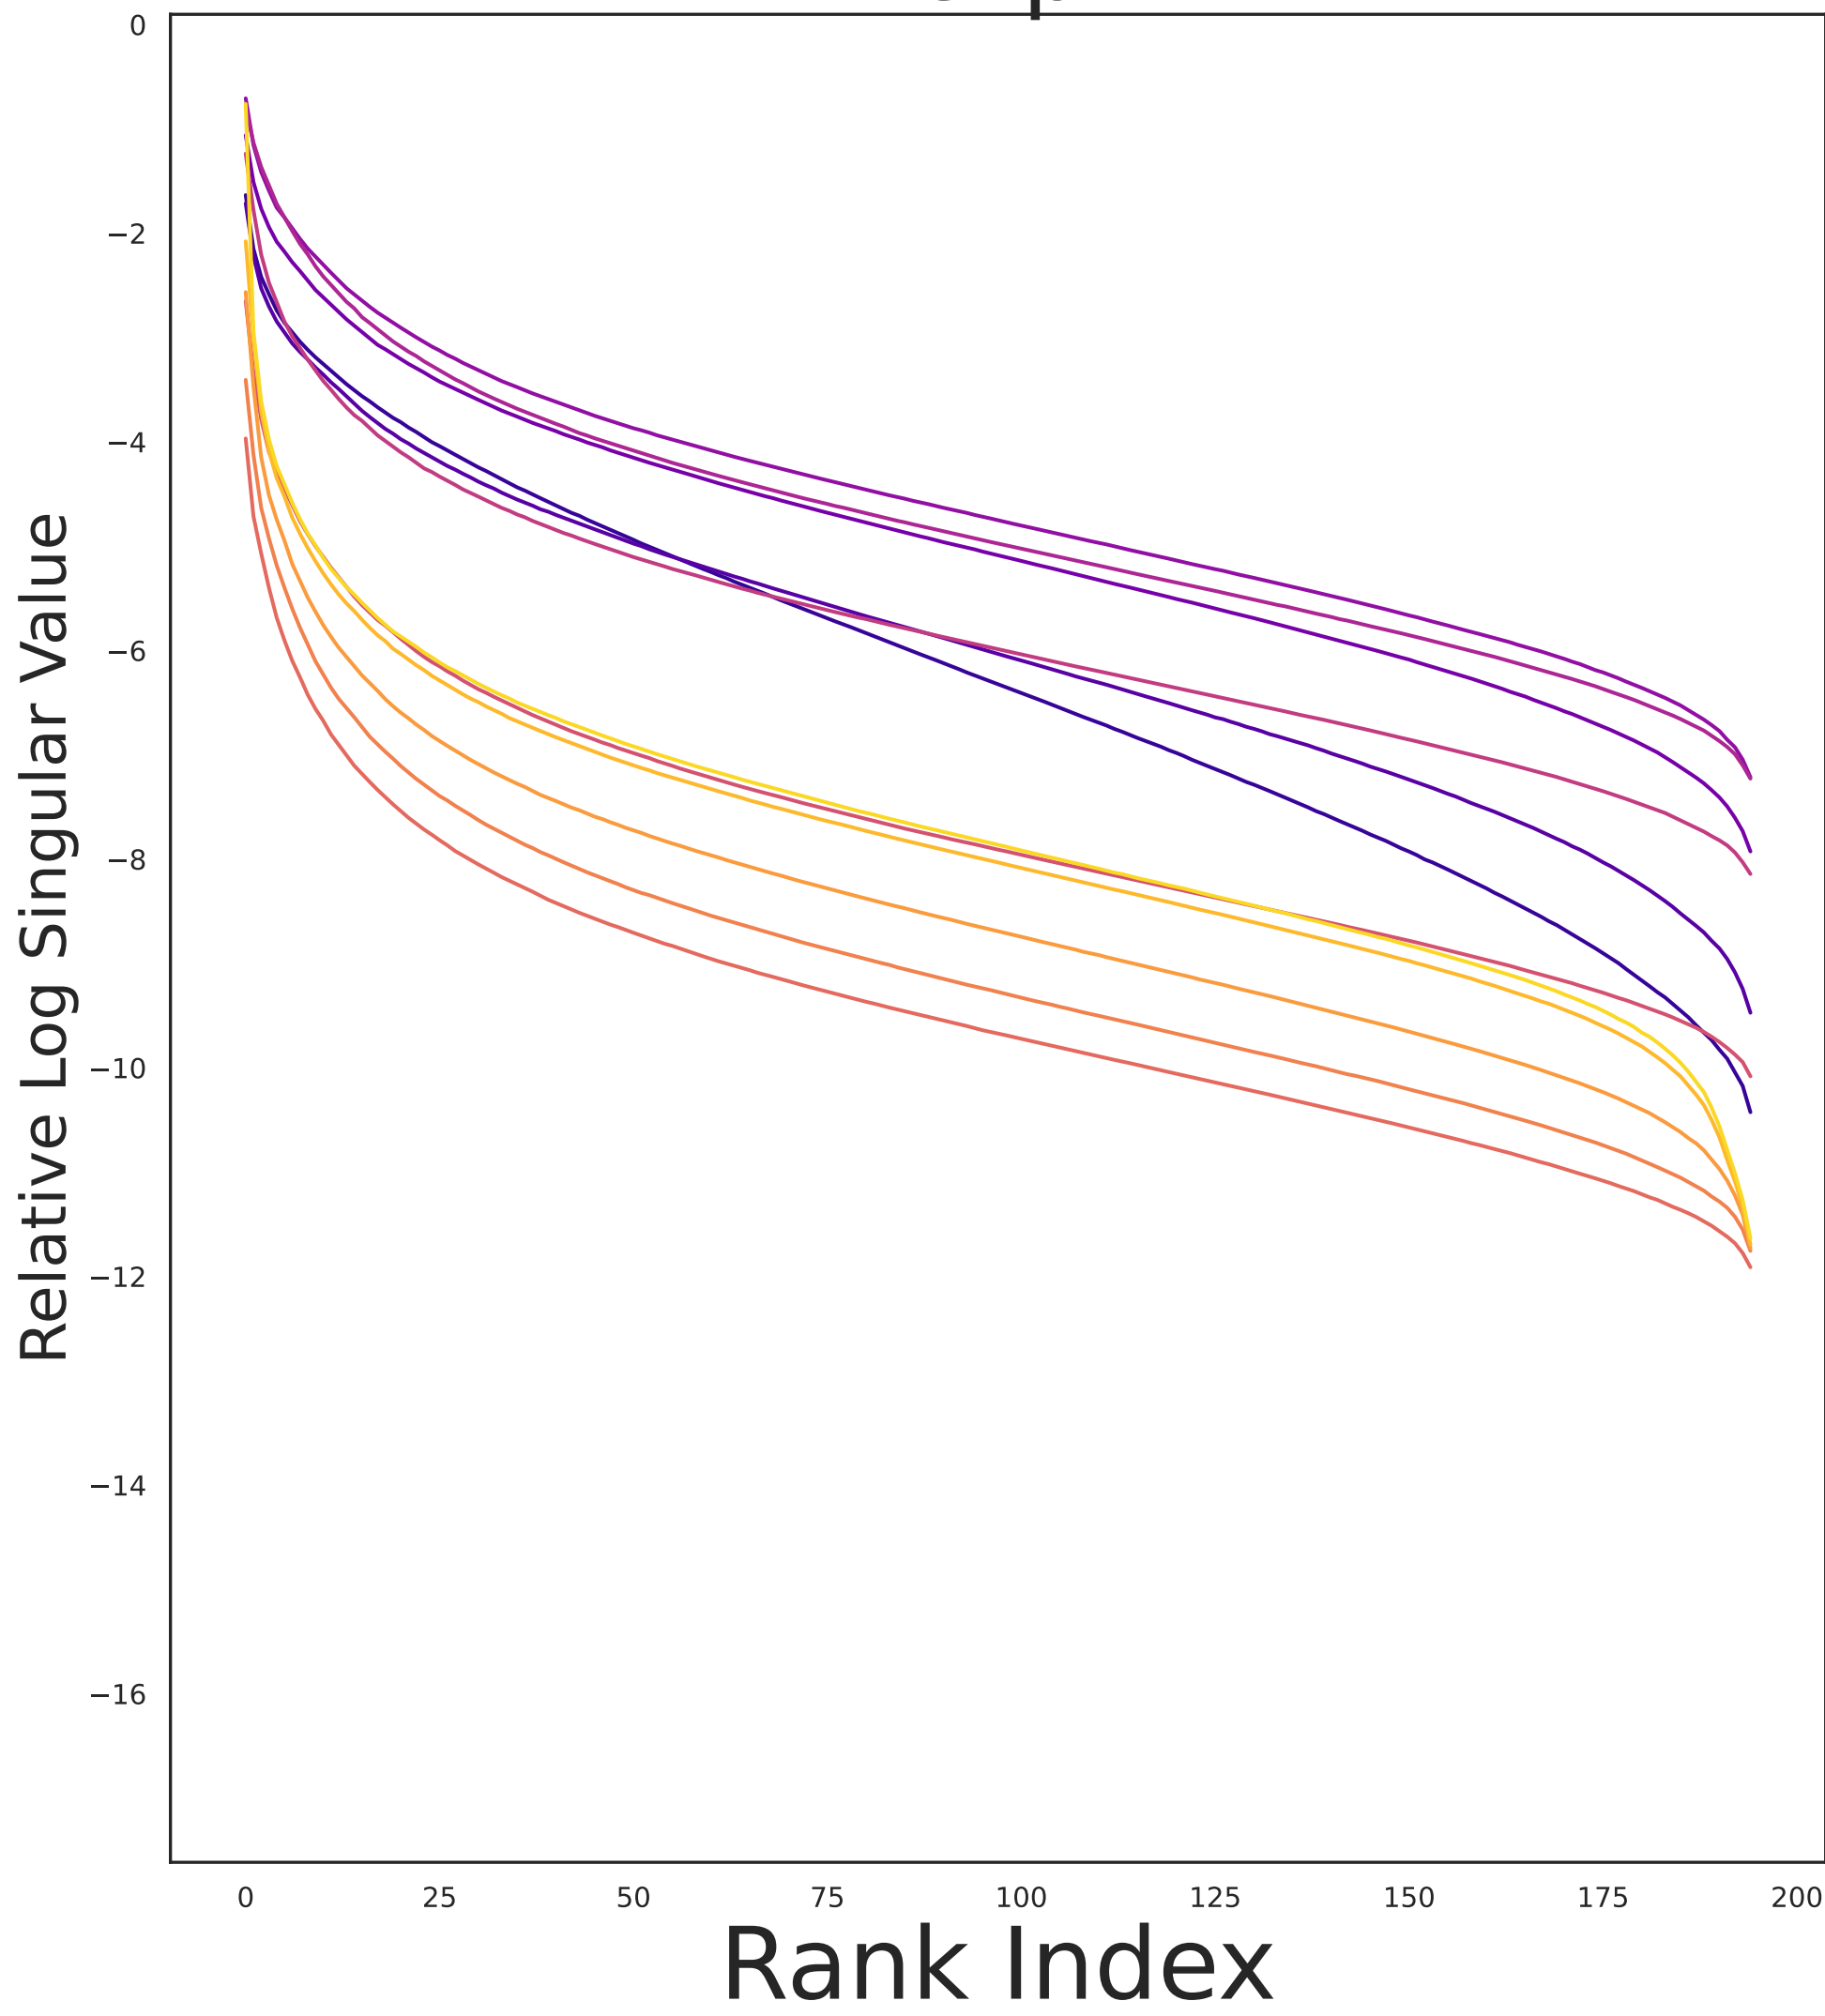

clip\_distilled

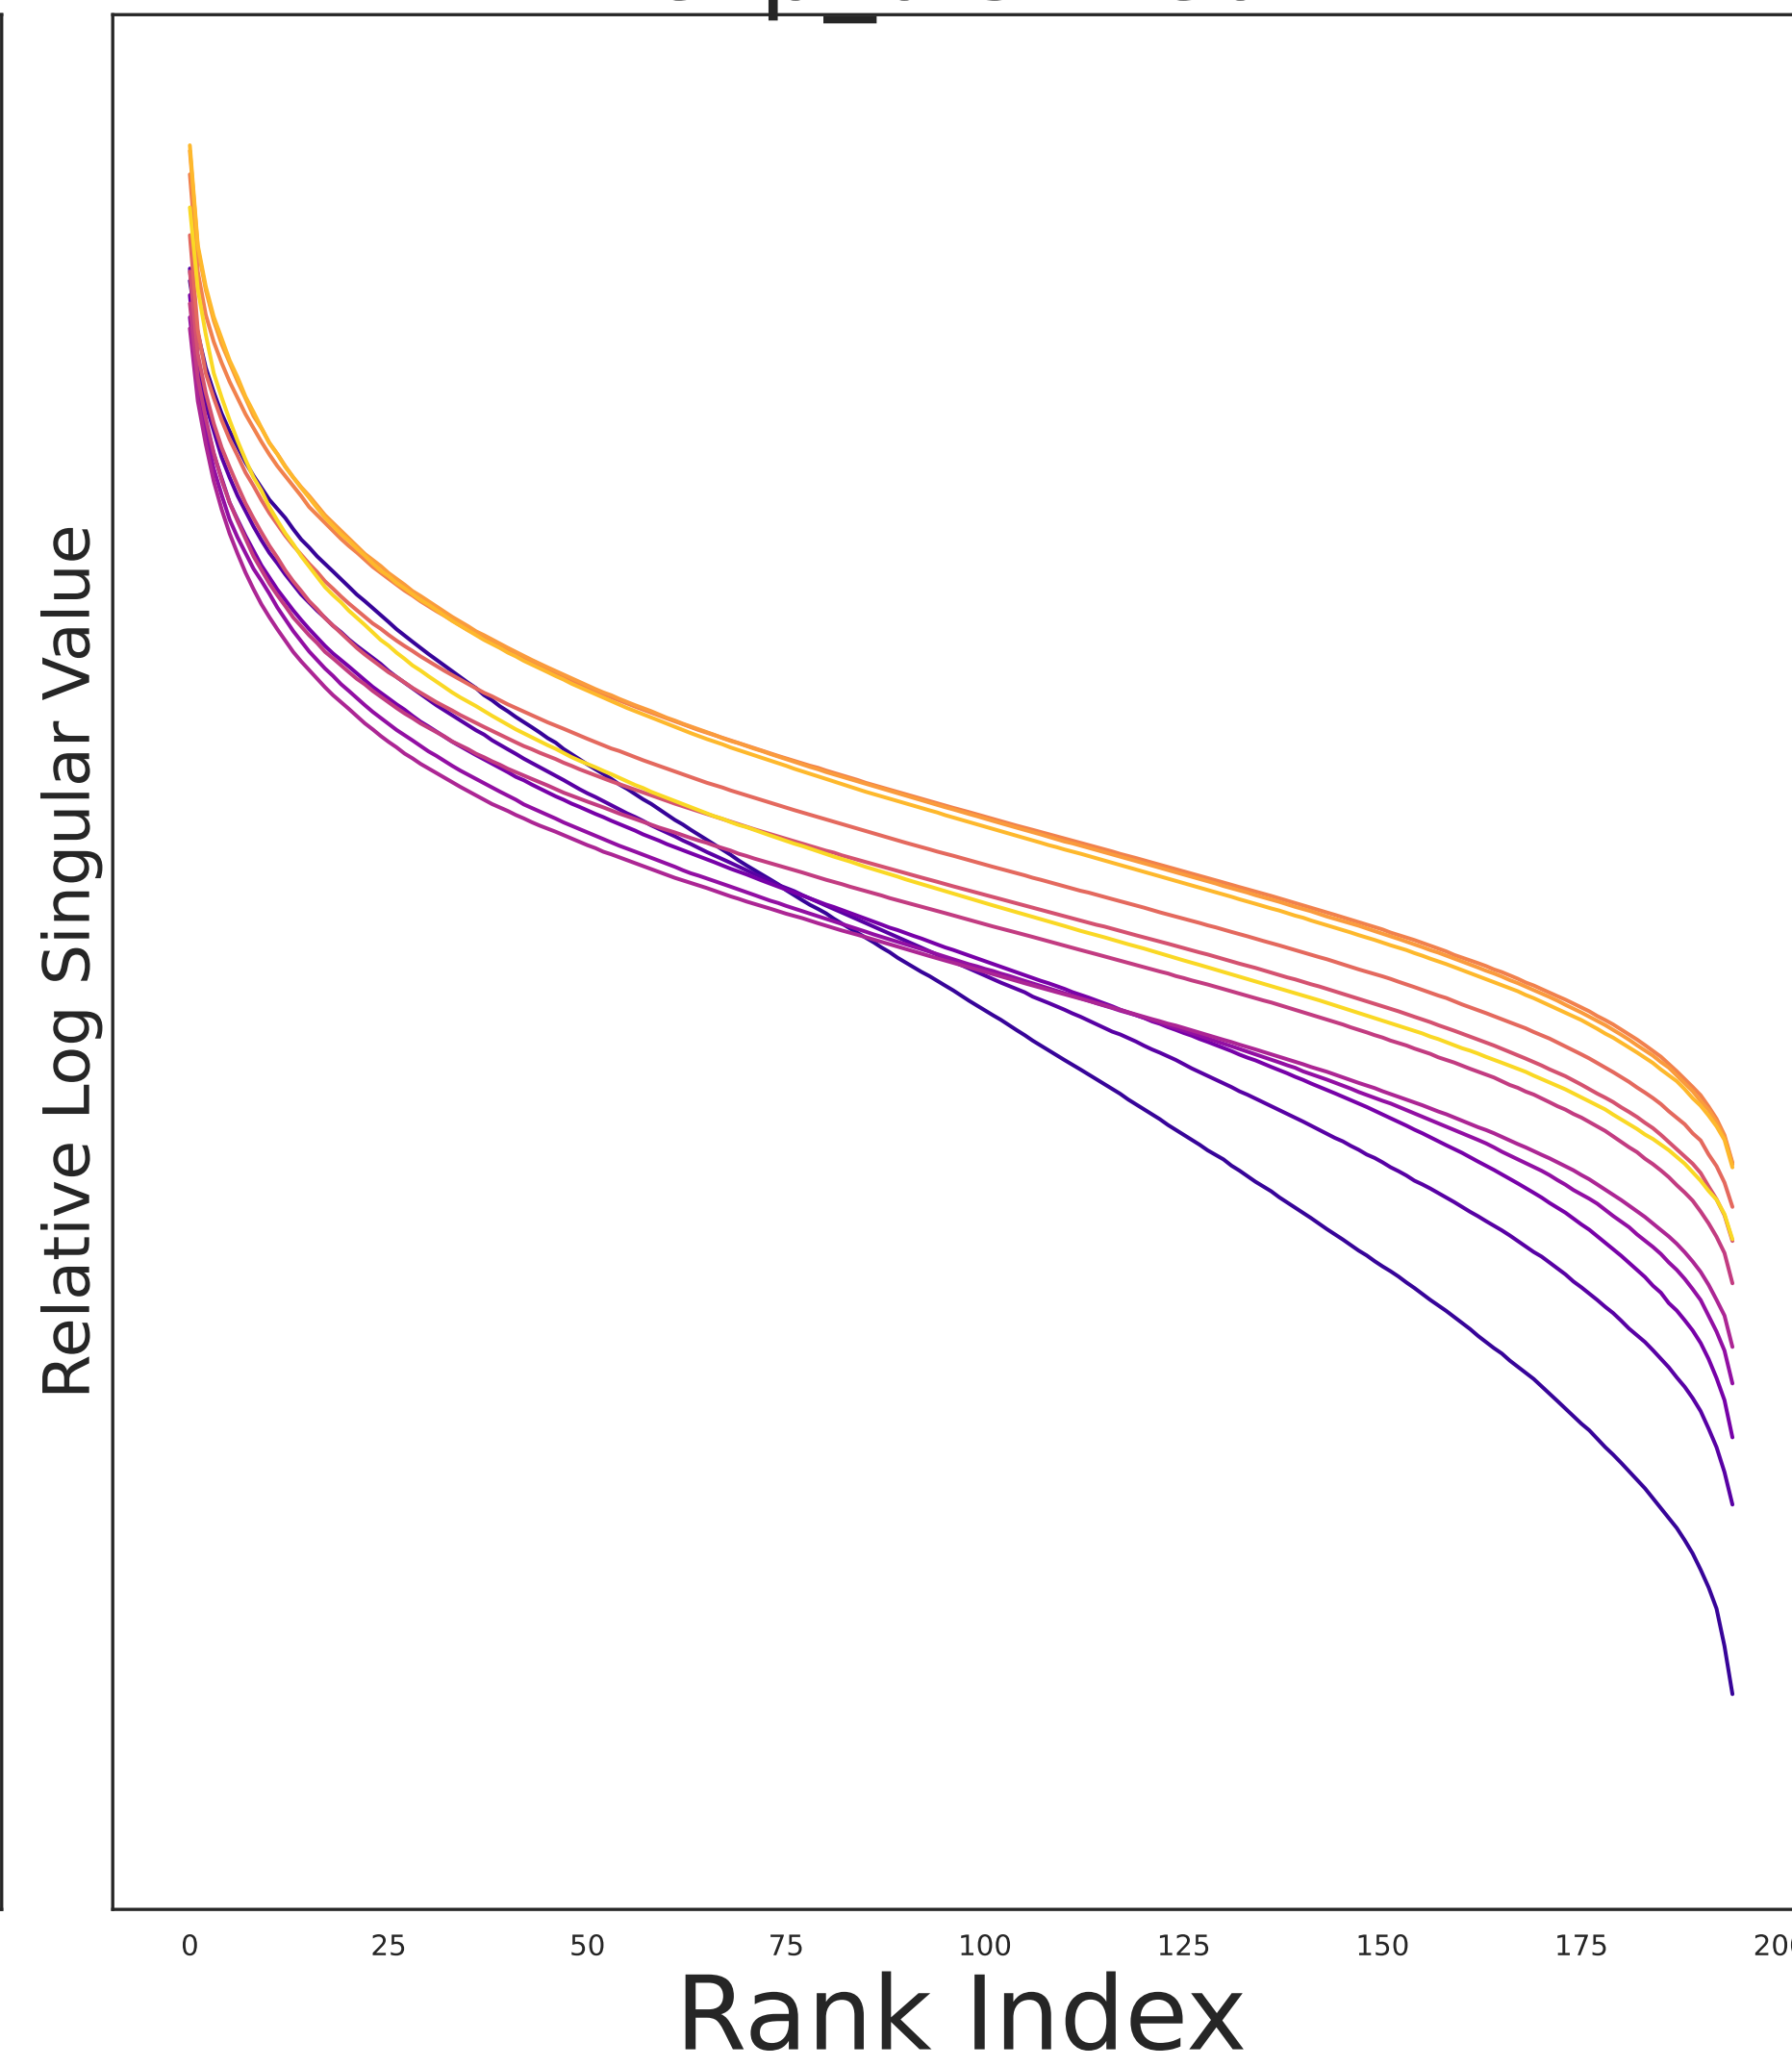

clip\_distilled\_nt

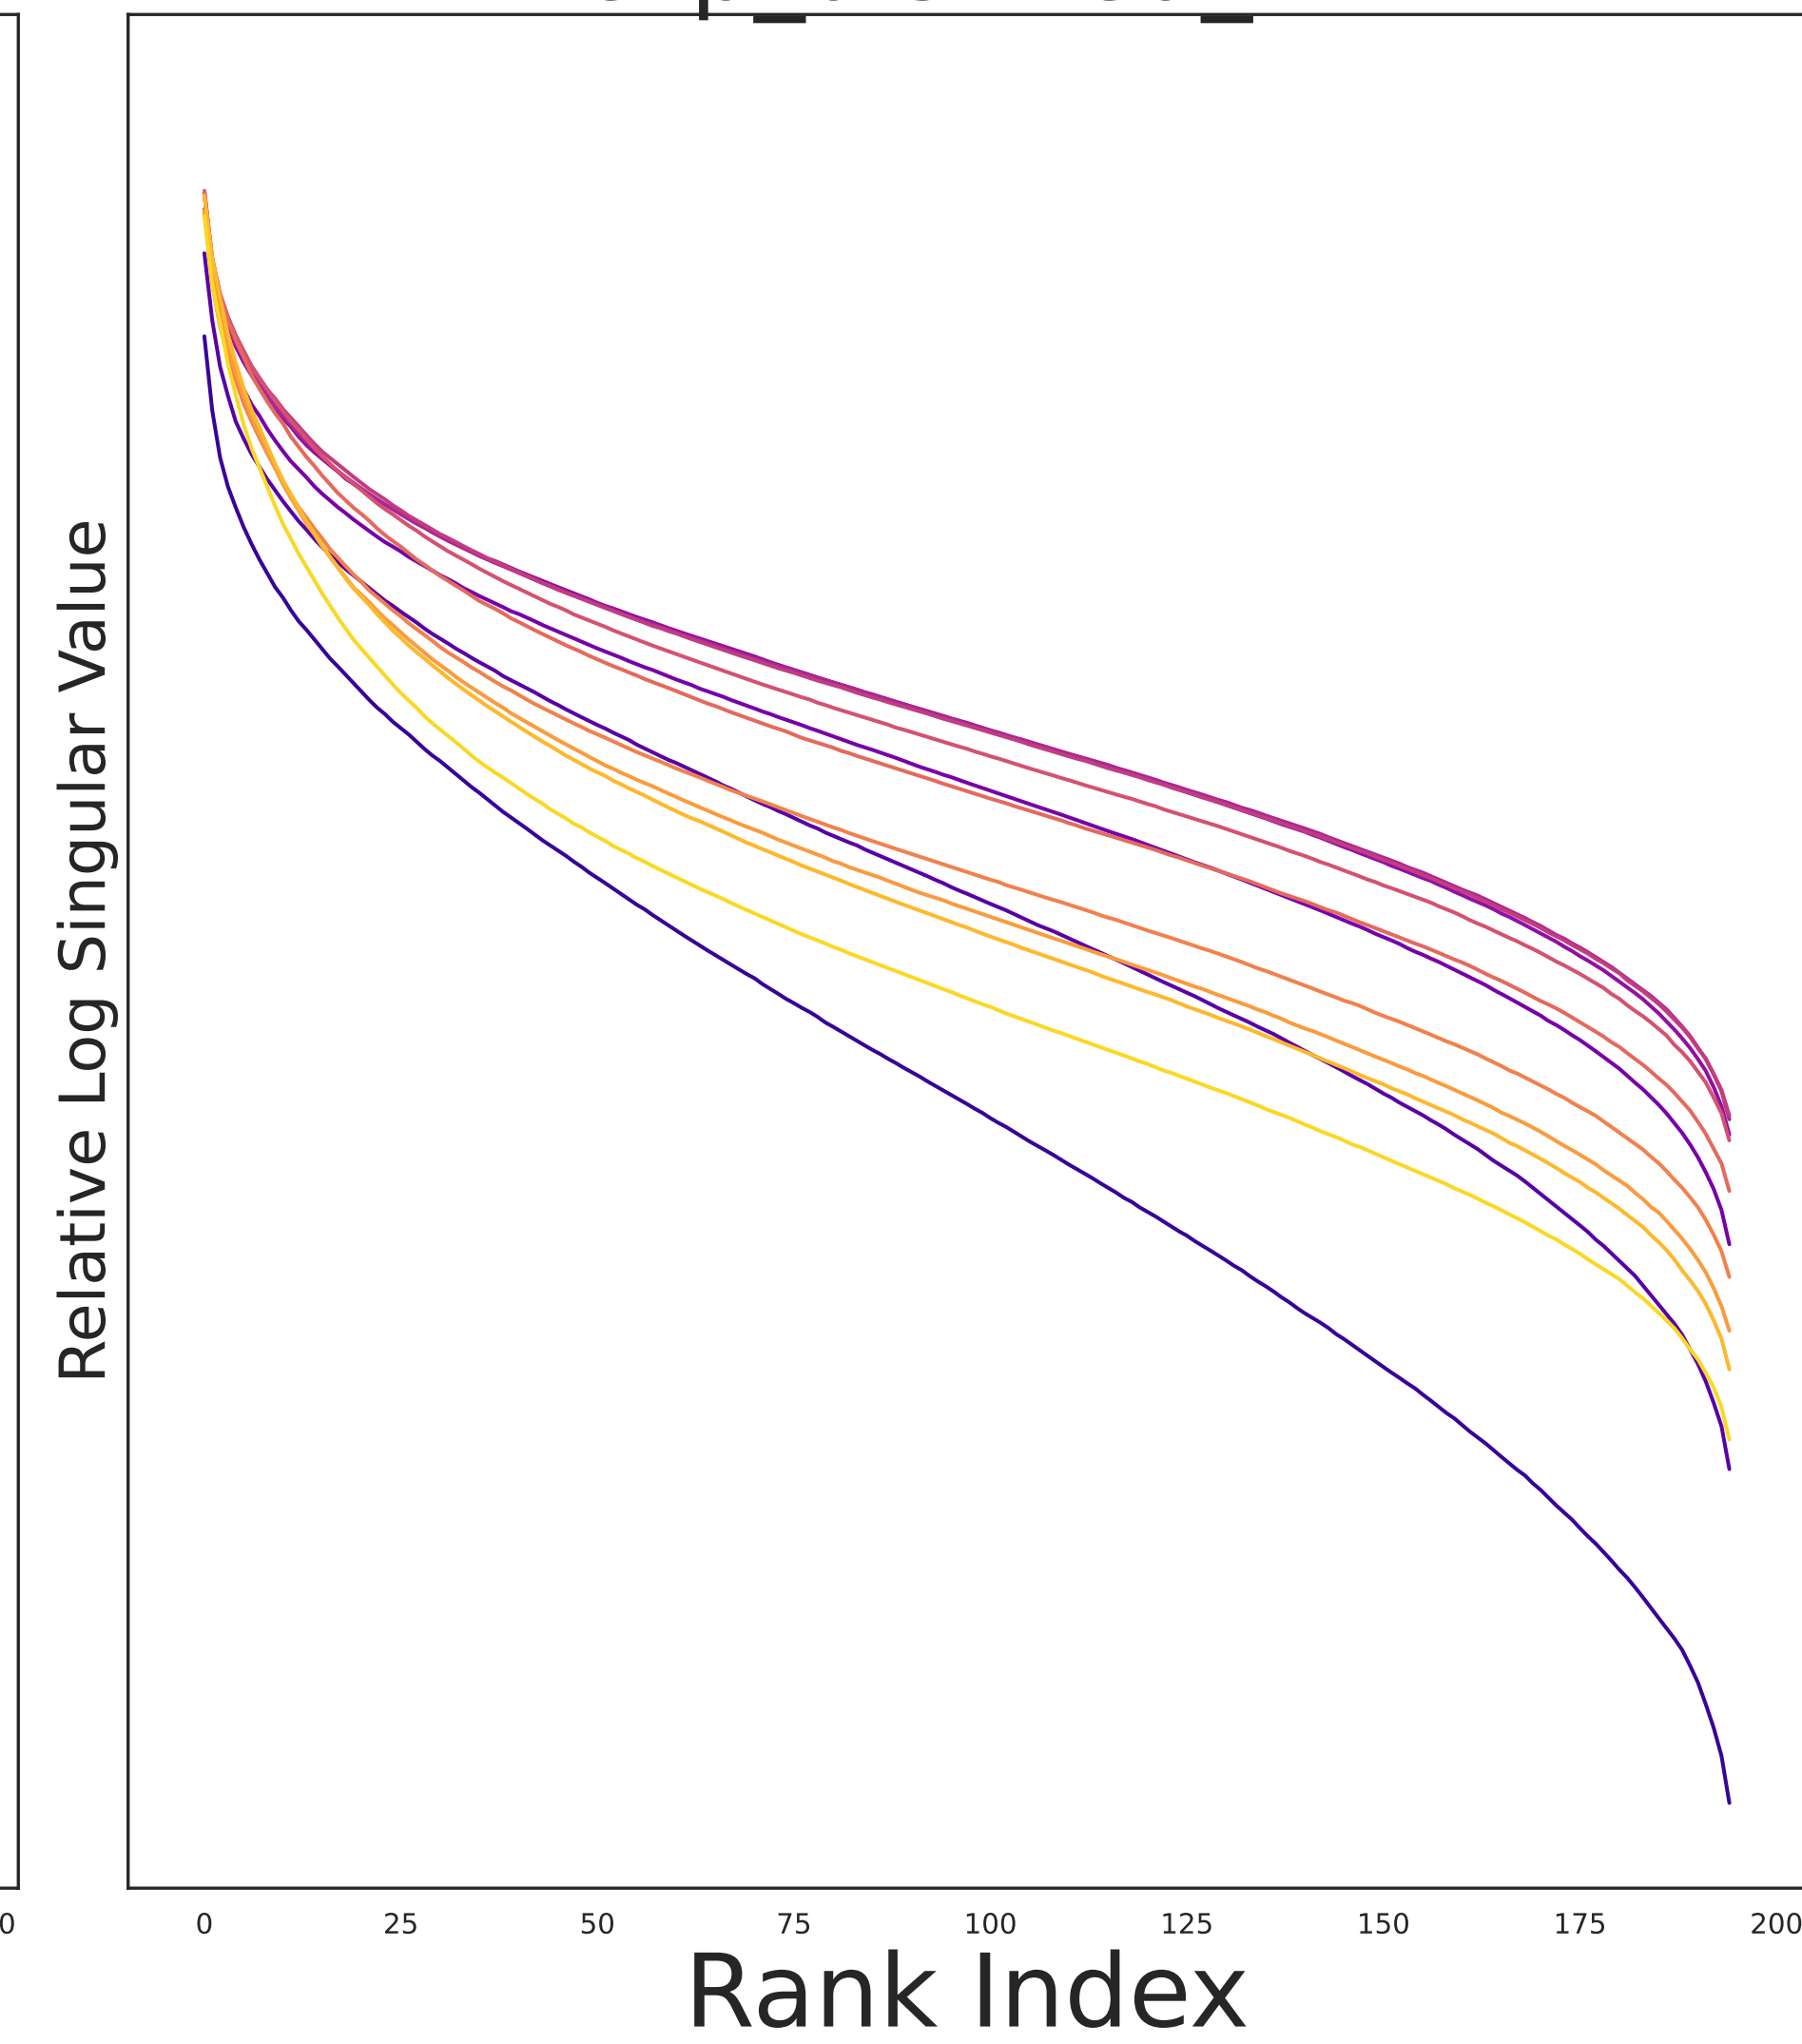

Supplement: supplementary_material [file attachment]
